# Supplementary material for: Performance Under Pressure: Development and Validation of the OSCE Anxiety Scale for Healthcare Education
Source: Research Square preprint supplement (doi:10.21203/rs.3.rs-7020710/v1), 2025-08-11
Supplement: Supplementary file 1 [file 8350fee2b0215ffe89e400fe.docx]

**SUPPLEMENTARY DATA**

**Table S1. Comprehensive Model Comparison: Alternative Factor Structures**

| **Model** | **χ² (df)** | **χ²/df** | **CFI** | **TLI** | **RMSEA [90% CI]** | **SRMR** | **AIC** | **BIC** | **Δχ²** | **Δdf** | **p** | **Evidence** |
| --- | --- | --- | --- | --- | --- | --- | --- | --- | --- | --- | --- | --- |
| Single Factor | 1247.82 (170) | 7.34 | .721 | .693 | .133 [.126, .140] | .098 | 28,456 | 28,623 | - | - | - | Poor fit |
| Two-Factor (Orthogonal) | 456.73 (170) | 2.69 | .891 | .876 | .068 [.060, .076] | .071 | 27,234 | 27,401 | 791.09 | 0 | <.001 | Better |
| Two-Factor (Correlated) | 198.45 (169) | 1.17 | .983 | .980 | .021 [.012, .029] | .033 | 26,578 | 26,749 | 258.28 | 1 | <.001 | Excellent |
| Three-Factor | 192.18 (167) | 1.15 | .985 | .982 | .020 [.011, .028] | .032 | 26,584 | 26,760 | 6.27 | 2 | .043 | Marginal |
| Bifactor | 189.34 (150) | 1.26 | .984 | .979 | .024 [.016, .032] | .031 | 26,607 | 26,823 | 2.84 | 17 | >.999 | No improvement |

Note: Two-factor correlated model retained as optimal balance of fit, parsimony, and theoretical interpretability

**Table S2. Exploratory Factor Analysis: Pattern and Structure Matrices**

| **Item** | **Pattern Matrix** |  | **Structure Matrix** |  | **h²** | **u²** |
| --- | --- | --- | --- | --- | --- | --- |
|  | **F1 (Emotionality)** | **F2 (Worry)** | **F1 (Emotionality)** | **F2 (Worry)** |  |  |
| 2. Uneasy, upset feeling | **.671** | .089 | .723 | .481 | .465 | .535 |
| 8. Very nervous and shaky | **.698** | .098 | .756 | .502 | .507 | .493 |
| 9. Nervous when well prepared | **.724** | .067 | .763 | .489 | .532 | .468 |
| 10. Uneasy before feedback | **.634** | .156 | .725 | .526 | .442 | .558 |
| 11. Feel very tense | **.713** | .123 | .785 | .539 | .533 | .467 |
| 15. Feel very panicky | **.691** | .078 | .736 | .481 | .487 | .513 |
| 16. Worry before OSCE | **.658** | .145 | .743 | .543 | .468 | .532 |
| 18. Heart beating fast | **.701** | .101 | .760 | .510 | .509 | .491 |
| 3. Grade thoughts interfere | .123 | **.584** | .465 | .656 | .365 | .635 |
| 4. Freeze up | .067 | **.623** | .429 | .662 | .396 | .604 |
| 5. Worry about education | .156 | **.567** | .487 | .658 | .362 | .638 |
| 6. More confused | .098 | **.612** | .455 | .669 | .392 | .608 |
| 7. Performance thoughts interfere | .145 | **.689** | .547 | .774 | .509 | .491 |
| 14. Get in own way | .123 | **.645** | .498 | .717 | .436 | .564 |
| 17. Consequences of failing | .078 | **.598** | .427 | .643 | .367 | .633 |
| 20. Forget facts when nervous | .089 | **.656** | .467 | .708 | .444 | .556 |

Note: Pattern coefficients ≥ .40 in bold; h² = communality; u² = uniqueness Eigenvalues: F1 = 7.247, F2 = 3.458; % Variance: F1 = 36.2%, F2 = 17.3%, Total = 53.5% Factor correlation: r = .583

**Table S3. Cross-Validation and Measurement Invariance Results**

| **Sample** | **n** | **χ² (df)** | **χ²/df** | **CFI** | **TLI** | **RMSEA [90% CI]** | **SRMR** | **Sample** |
| --- | --- | --- | --- | --- | --- | --- | --- | --- |
| Calibration | 365 | 198.45 (169) | 1.17 | .983 | .980 | .021  [.012, .029] | .033 | Calibration |
| Validation | 243 | 201.32 (169) | 1.19 | .978 | .974 | .032  [.018, .045] | .037 | Validation |

**Measurement Invariance Testing**

| **Model** | **χ² (df)** | **CFI** | **RMSEA** | **Δχ²** | **Δdf** | **p** | **Decision** | **Model** |
| --- | --- | --- | --- | --- | --- | --- | --- | --- |
| Configural | 399.77 (338) | .981 | .026 | - | - | - | Baseline | Configural |
| Metric | 418.02 (352) | .979 | .027 | 18.25 | 14 | .198 | Accept | Metric |
| Scalar | 441.13 (366) | .976 | .028 | 23.11 | 14 | .058 | Accept | Scalar |
| Strict | 472.51 (382) | .972 | .030 | 31.38 | 16 | .012 | Reject | Strict |

Note: Configural, metric, and scalar invariance supported; strict invariance not achieved

**Table S4. Inter-Item Correlation Matrix (20×20)**

| **Item** | **1** | **2** | **3** | **4** | **5** | **6** | **7** | **8** | **9** | **10** | **11** | **12** | **13** | **14** | **15** | **16** | **17** | **18** | **19** | **20** |
| --- | --- | --- | --- | --- | --- | --- | --- | --- | --- | --- | --- | --- | --- | --- | --- | --- | --- | --- | --- | --- |
| 1 | 1.00 |  |  |  |  |  |  |  |  |  |  |  |  |  |  |  |  |  |  |  |
| 2 | .44 | 1.00 |  |  |  |  |  |  |  |  |  |  |  |  |  |  |  |  |  |  |
| 3 | .15 | .39 | 1.00 |  |  |  |  |  |  |  |  |  |  |  |  |  |  |  |  |  |
| 4 | .49 | .41 | .36 | 1.00 |  |  |  |  |  |  |  |  |  |  |  |  |  |  |  |  |
| 5 | .23 | .32 | .33 | .41 | 1.00 |  |  |  |  |  |  |  |  |  |  |  |  |  |  |  |
| 6 | .32 | .36 | .37 | .43 | .39 | 1.00 |  |  |  |  |  |  |  |  |  |  |  |  |  |  |
| 7 | .41 | .51 | .47 | .52 | .41 | .49 | 1.00 |  |  |  |  |  |  |  |  |  |  |  |  |  |
| 8 | .36 | .67 | .34 | .41 | .28 | .31 | .46 | 1.00 |  |  |  |  |  |  |  |  |  |  |  |  |
| 9 | .51 | .72 | .31 | .39 | .25 | .28 | .43 | .73 | 1.00 |  |  |  |  |  |  |  |  |  |  |  |
| 10 | .33 | .63 | .37 | .43 | .32 | .34 | .49 | .61 | .67 | 1.00 |  |  |  |  |  |  |  |  |  |  |
| 11 | .41 | .71 | .35 | .42 | .29 | .32 | .47 | .71 | .75 | .65 | 1.00 |  |  |  |  |  |  |  |  |  |
| 12 | .45 | .58 | .31 | .48 | .27 | .33 | .44 | .59 | .62 | .56 | .64 | 1.00 |  |  |  |  |  |  |  |  |
| 13 | .28 | .49 | .26 | .34 | .22 | .25 | .36 | .52 | .54 | .47 | .56 | .51 | 1.00 |  |  |  |  |  |  |  |
| 14 | .31 | .38 | .45 | .49 | .38 | .46 | .52 | .36 | .34 | .41 | .39 | .37 | .31 | 1.00 |  |  |  |  |  |  |
| 15 | .34 | .69 | .32 | .41 | .26 | .29 | .44 | .68 | .71 | .62 | .72 | .58 | .54 | .37 | 1.00 |  |  |  |  |  |
| 16 | .38 | .66 | .36 | .44 | .31 | .33 | .48 | .65 | .69 | .64 | .69 | .59 | .48 | .41 | .67 | 1.00 |  |  |  |  |
| 17 | .24 | .34 | .39 | .37 | .35 | .38 | .43 | .31 | .29 | .36 | .33 | .31 | .26 | .46 | .32 | .37 | 1.00 |  |  |  |
| 18 | .29 | .70 | .31 | .38 | .25 | .28 | .42 | .69 | .72 | .61 | .73 | .56 | .51 | .34 | .71 | .66 | .30 | 1.00 |  |  |
| 19 | .26 | .44 | .34 | .35 | .31 | .33 | .38 | .42 | .43 | .46 | .45 | .43 | .36 | .39 | .45 | .48 | .38 | .44 | 1.00 |  |
| 20 | .33 | .43 | .44 | .48 | .39 | .45 | .52 | .41 | .38 | .45 | .43 | .40 | .34 | .51 | .41 | .46 | .42 | .41 | .41 | 1.00 |

Note: N = 608. All correlations significant at p < .01 except those < .15

**Figure S1. Scree Plot with Parallel Analysis for Factor Retention**

[INSERT FIGURE S1 HERE]

*Note: Eigenvalues from exploratory factor analysis (solid blue line) compared to parallel analysis using random data (dashed red line). Factors with eigenvalues above the parallel analysis line should be retained, supporting the 2-factor solution (green vertical line).*

**Figure S2. Comprehensive Model Comparison: Alternative Factor Structures**

[INSERT FIGURE S2 HERE]

*Note: Comprehensive comparison of five alternative factor structures. CFI values are shown as bars, RMSEA as circles, χ²/df ratios as text. The two-factor correlated model (highlighted in green) demonstrates optimal balance of fit, parsimony, and theoretical interpretability. Higher CFI and lower RMSEA indicate better fit.*

**Figure S3. Factor Loading Pattern: EFA Two-Factor Solution**

[INSERT FIGURE S3 HERE]

*Note: Factor loadings from exploratory factor analysis pattern matrix. All items show primary loadings ≥ .40 on their intended factors. The red dashed line indicates the minimum loading threshold for practical significance. Clear, simple structure with minimal cross-loadings supports the two-factor interpretation.*
