# Supplementary material for: Performance Under Pressure: Development and Validation of the OSCE Anxiety Scale for Healthcare Education
Source: Research Square preprint supplement (doi:10.21203/rs.3.rs-7020710/v1), 2025-08-11
Supplement: Supplementary file 2 [file 904c19e27df8fdcba177736b.docx]

**The OSCE Anxiety Scale (OAS)**

**Complete Instrument and Implementation Guide**

**INSTRUMENT OVERVIEW**

**Name:** OSCE Anxiety Scale (OAS)
**Authors:** Majid Ali, Ejaz Cheema
**Purpose:** Assessment of anxiety specific to Objective Structured Clinical Examinations in healthcare students
**Target Population:** Healthcare students (medical, nursing, pharmacy, allied health)
**Administration Time:** 5-8 minutes
**Subscales:** Emotionality (8 items), Worry (8 items), Total Scale (20 items)
**Psychometric Properties:** Excellent reliability (α = .865-.914), validated two-factor structure

**COMPLETE OSCE ANXIETY SCALE INSTRUMENT**

**INSTRUCTIONS TO PARTICIPANTS:**

*Below are statements that describe how people might feel about Objective Structured Clinical Examinations (OSCEs). Please read each statement carefully and select the response that best describes how you generally feel about OSCEs, especially considering your most recent OSCE experience or upcoming OSCE.*

*There are no right or wrong answers. Please respond honestly and select only one answer for each statement.*

**Response Scale:**

**1 = Almost Never**

**2 = Sometimes**

**3 = Often**

**4 = Almost Always**

**SCALE ITEMS:**

| **Item** | **Statement** | **1** | **2** | **3** | **4** |
| --- | --- | --- | --- | --- | --- |
| 1 | I feel confident and relaxed while performing on OSCE stations | ☐ | ☐ | ☐ | ☐ |
| 2 | While taking the OSCE exam, I have an uneasy, upset feeling | ☐ | ☐ | ☐ | ☐ |
| 3 | Thinking about my grade in the OSCE interferes with my performance during the stations | ☐ | ☐ | ☐ | ☐ |
| 4 | I freeze up on OSCE stations | ☐ | ☐ | ☐ | ☐ |
| 5 | During the OSCE exam, I find myself worrying about whether I'll ever get through my education | ☐ | ☐ | ☐ | ☐ |
| 6 | The harder I work at performing on an OSCE station, the more confused I get | ☐ | ☐ | ☐ | ☐ |
| 7 | Thoughts of doing poorly on OSCE stations interfere with my concentration | ☐ | ☐ | ☐ | ☐ |
| 8 | I feel very nervous and shaky when performing on an OSCE station | ☐ | ☐ | ☐ | ☐ |
| 9 | Even when I'm well prepared for an OSCE station, I feel very nervous about it | ☐ | ☐ | ☐ | ☐ |
| 10 | I start feeling very uneasy just before receiving feedback on an OSCE station | ☐ | ☐ | ☐ | ☐ |
| 11 | During the OSCE exam, I feel very tense | ☐ | ☐ | ☐ | ☐ |
| 12 | I wish the OSCE exam did not bother me so much | ☐ | ☐ | ☐ | ☐ |
| 13 | During OSCE stations, I am so tense that my stomach gets upset | ☐ | ☐ | ☐ | ☐ |
| 14 | I feel like I get in my own way and mess up during OSCE stations, even when I know the material | ☐ | ☐ | ☐ | ☐ |
| 15 | I feel very panicky when I perform on an OSCE station | ☐ | ☐ | ☐ | ☐ |
| 16 | I worry a great deal before performing in the OSCE exam | ☐ | ☐ | ☐ | ☐ |
| 17 | During OSCE stations, I find myself thinking about the consequences of failing | ☐ | ☐ | ☐ | ☐ |
| 18 | I feel my heart beating very fast during OSCE stations | ☐ | ☐ | ☐ | ☐ |
| 19 | After the OSCE is over, I try to stop worrying about it, but I can't | ☐ | ☐ | ☐ | ☐ |
| 20 | During the OSCE exam, I get so nervous that I forget facts I really know | ☐ | ☐ | ☐ | ☐ |

**SCORING GUIDE**

**Step 1: Reverse Score Item 1**

Item 1 must be reverse-coded before calculating subscale scores:

- Original response 1 → 4
- Original response 2 → 3
- Original response 3 → 2
- Original response 4 → 1

**Step 2: Calculate Subscale Scores**

**Emotionality Subscale (E):** Sum items: 2, 8, 9, 10, 11, 15, 16, 18

- **Range:** 8-32
- **Higher scores** = Greater physiological/emotional anxiety

**Worry Subscale (W):** Sum items: 3, 4, 5, 6, 7, 14, 17, 20

- **Range:** 8-32
- **Higher scores** = Greater cognitive interference/worry

**Step 3: Additional Items & Total Score**

- Items 1 (reverse-coded), 12, 13, and 19 contribute to the total score but are not included in the primary subscales. These items may be analyzed separately or used for research purposes.

**Total Scale Score (T):** Sum all 20 items (including reverse-coded Item 1)

- **Range:** 20-80
- **Higher scores** = Greater overall OSCE anxiety

**CLINICAL INTERPRETATION GUIDELINES**

**Low Anxiety (≤25th percentile):**

- Emotionality ≤ 15
- Worry ≤ 14
- Total ≤ 36
- *Interpretation:* Minimal OSCE-related anxiety; may benefit from challenge-seeking opportunities

**Average Anxiety (26th-74th percentile):**

- Emotionality: 16-23
- Worry: 15-22
- Total: 37-56
- *Interpretation:* Normal/expected levels of OSCE anxiety; manageable with standard preparation

**High Anxiety (≥75th percentile):**

- Emotionality ≥ 24
- Worry ≥ 23
- Total ≥ 57
- *Interpretation:* Elevated anxiety that may interfere with performance; consider intervention

**Very High Anxiety (≥90th percentile):**

- Emotionality ≥ 28
- Worry ≥ 26
- Total ≥ 65
- *Interpretation:* Clinically significant anxiety; recommend counseling/support services

**ADMINISTRATION INSTRUCTIONS**

**Pre-Administration Setup**

1. **Timing:** Administer 1-7 days before OSCE or immediately after OSCE experience
2. **Consent:** Obtain informed consent if used for research purposes

**Instructions to Administrator**

**Introduction Script:** *"This questionnaire asks about your feelings and experiences related to Objective Structured Clinical Examinations (OSCEs). Your responses will help us understand how students experience OSCEs and may inform educational improvements. Please answer honestly based on your general feelings about OSCEs. There are no right or wrong answers, and your responses will be kept confidential."*

**During Administration:**

- Allow 5-8 minutes for completion
- Encourage participants to answer all items
- Clarify OSCE definition if needed: "OSCEs are practical exams where you rotate through stations demonstrating clinical skills with standardized patients or simulators"
- Do not provide guidance on how to respond to specific items

**Post-Administration:**

- Check for missing responses
- If >10% items missing, readminister
- Score immediately or store securely for later scoring

**Missing Data Handling**

**If 1-2 items missing per subscale:**

- Calculate subscale mean for completed items
- Multiply by number of items in subscale
- Round to nearest whole number

**If >2 items missing per subscale:**

- Do not calculate that subscale score
- Note as incomplete data

**Example:** If Emotionality subscale has 1 missing item and 7 completed items sum to 14:

- Mean = 14/7 = 2.0
- Estimated subscale score = 2.0 × 8 = 16

**VALIDITY AND RELIABILITY EVIDENCE**

**Internal Consistency Reliability**

- Emotionality: α = .915 (95% CI [.902, .928])
- Worry: α = .856 (95% CI [.837, .875])
- Total Scale: α = .932 (95% CI [.923, .941])

**Factor Structure**

- Two-factor structure confirmed via CFA
- Excellent model fit: CFI = .983, RMSEA = .021, SRMR = .033
- Factors moderately correlated (r = .583), supporting discriminant validity

**Content Validity**

- Items adapted from validated Test Anxiety Inventory (Spielberger, 1980)
- Expert panel review by healthcare educators and psychometricians
- Student cognitive interviews confirmed item clarity and relevance

**Construct Validity**

- Convergent validity: AVE > .50 for both factors
- Discriminant validity: HTMT = .687 (< .85 threshold)
- Known-groups validity: Significant differences across education levels

**RESEARCH AND CLINICAL APPLICATIONS**

**Research Uses**

- **Pre-post intervention studies:** Assess anxiety reduction programs
- **Correlational research:** Examine anxiety-performance relationships
- **Program evaluation:** Compare anxiety levels across curricula
- **Cross-cultural research:** Validate in different educational contexts

**Clinical/Educational Uses**

- **Student screening:** Identify high-anxiety students needing support
- **Curriculum development:** Inform OSCE design and preparation programs
- **Academic support:** Target interventions for struggling students
- **Wellness programs:** Monitor student psychological wellbeing

**Administration Frequency**

- **Pre-OSCE:** 1-7 days before exam (trait anxiety)
- **Post-OSCE:** Immediately after exam (state anxiety + retrospective)
- **Longitudinal:** Multiple timepoints to track anxiety changes
- **Research:** Depends on study design and research questions

**ETHICAL CONSIDERATIONS**

**Informed Consent Requirements**

- Explain the purpose and voluntary nature
- Describe data use and storage
- Provide contact information for questions
- Allow withdrawal without penalty

**Confidentiality**

- Use participant IDs rather than names
- Store data securely (encrypted if digital)
- Limit access to authorized personnel
- Follow institutional data management policies

**Risk Management**

- Monitor for extremely high anxiety scores
- Provide referral resources for distressed students
- Consider excluding from high-stakes decisions
- Ensure appropriate use by trained personnel

**Version Information:**

- Current Version: 1.0 (2025)
- Last Updated: [1st July 2025]

**© 2025 [School of Pharmacy, UMT]. All rights reserved. This instrument may be used for research and educational purposes with proper attribution. Commercial use requires permission.**
